# Supplementary material for: The high diversity of gametogenic pathways in amphispermic water frog hybrids from Eastern Ukraine
Source: PeerJ. 2022 Aug 23;10:e13957. doi: 10.7717/peerj.13957 (PMC9415524; doi:10.7717/peerj.13957)
Supplement: Table S1 — Normal chromosomal plates –prophase I meiosis (13 bivalents), prophase II meiosis (13 univalents); mitotic chromosomal plates—metaphase (2n = 26 chromosomes). Aneuploid chromosomal plates –number of chromosomes more or less than 13 bivalents or univalents for meiosis more or less than 26 chromosomes for mitosis [file peerj-10-13957-s004.xlsx]

## Sheet: Table S1. 12092021
	Gametes type	Genome composition	Locality	Mozh river						Iskiv pond					Udy river
			Frog ID	17T-8	17T-10	17T-5	18T-6	18T-7	18T-8	18I-90	18I-91	19I-60	19I-61	19I-62	17U-4.2
	Normal	L	Interphase nuclei	0	11	3	0	52	36	4	27	25	16	114	4
			Spermatids	0	5	0	0	24	22	1	31	25	23	63	2
			Mitosis	2	3	6	0	1	0	1	0	1	4	3	6
			Meiosis I	1	16	0	0	1	5	0	1	0	18	4	0
			Meiosis II	0	0	2	0	51	77	2	37	0	0	13	8
		R	Interphase nuclei*	37	63	80	54	86	105	77	54	61	13	112	60
			Spermatids	53	53	25	48	17	18	11	26	4	6	39	39
			Mitosis	4	6	3	8	2	0	6	0	4	1	19	19
			Meiosis I	34	59	18	32	6	4	3	1	2	12	48	3
			Meiosis II	1	0	6	5	22	7	30	40	0	0	37	19
		LL*	Interphase nuclei	n/a	n/a	n/a	n/a	n/a	n/a	n/a	n/a	n/a	n/a	n/a	n/a
			Spermatids	n/a	n/a	n/a	n/a	n/a	n/a	n/a	n/a	n/a	n/a	n/a	n/a
			Mitosis	1	0	0	0	0	0	0	0	0	0	0	0
			Meiosis I	3	n/a	n/a	n/a	n/a	n/a	n/a	n/a	n/a	n/a	n/a	n/a
			Meiosis II	0	n/a	n/a	n/a	n/a	n/a	n/a	n/a	n/a	n/a	n/a	n/a
		RR or LR*	Interphase nuclei*	10	n/a	n/a	n/a	n/a	n/a	n/a	n/a	n/a	n/a	n/a	n/a
			Spermatids	10	n/a	n/a	n/a	n/a	n/a	n/a	n/a	n/a	n/a	n/a	n/a
			Mitosis	3	0	0	0	0	0	0	0	0	0	0	0
			Meiosis I	19	0	0	0	0	0	0	0	0	0	0	0
			Meiosis II	0	0	0	0	0	0	0	0	0	0	0	0
	Aneuploid	L	Mitosis	1	3	2	0	10	5	0	4	2	7	0	14
			Meiosis I	0	4	2	0	3	3	0	0	0	0	1	0
			Meiosis II	0	0	1	0	3	7	1	12	0	0	0	3
		R	Mitosis	3	4	29	6	4	1	5	1	6	1	10	30
			Meiosis I	36**	8	17	19	3	0	5	0	2	12	6	14
			Meiosis II		2	2	5	2	0	43	10	28	0	4	1
				* - in case of nuclei with RrS1 signals, we don't know is there R or RL genome due to the method features
				** - in case of tetravalents, we don't know what is Meiosis II exactly
				n/a - Not applicable
