# Supplementary material for: The high diversity of gametogenic pathways in amphispermic water frog hybrids from Eastern Ukraine
Source: PeerJ. 2022 Aug 23;10:e13957. doi: 10.7717/peerj.13957 (PMC9415524; doi:10.7717/peerj.13957)
Supplement: Table S2 — SVL –snout-vent length [file peerj-10-13957-s005.xlsx]

## Sheet: Sheet1
# of male	Frogs ID	Locality, system, coordinates	SVL, mm	Testis lenght, mm
				Left	Right
1	17T-5	Mozh river, Tymchenky village R-E-system, 49°44'57''N; 36°09'46''E	52.4	2.1	5.8
2	17T-8		54.8	4.5	5
3	17T-10		54.1	3.9	4.5
4	18T-6		53.8	3.9	8.3
5	18T-7		53.3	4.5	6
6	18T-8		47.9	4.6	5.9
7	18I-90	Iskiv pond, Zmiiv region R-E-system 49°37'40''N; 36°16'58''E	49.5	4.1	3.9
8	18I-91		55.8	7.8	4.8
9	19I-61		60.2	6.2	4.3
10	19I-60		68.5	4	4
11	19I-62		55.5	3.3	3.3
12	17U-4	Udy river, R-E-system 49°58'06''N; 36°08'13''E	43.8	3.4	3.4
	Table S2. List and metrics of studied diploid male water frogs Pelophylax esculentus. SVL – snout-vent length
